# Supplementary material
Source: Springer Nature journal article supplement (https://www.springermedizin.de/resource/supplementary/12936_2011_1939_MOESM2_ESM.pdf/9542122)

Baseline 2006

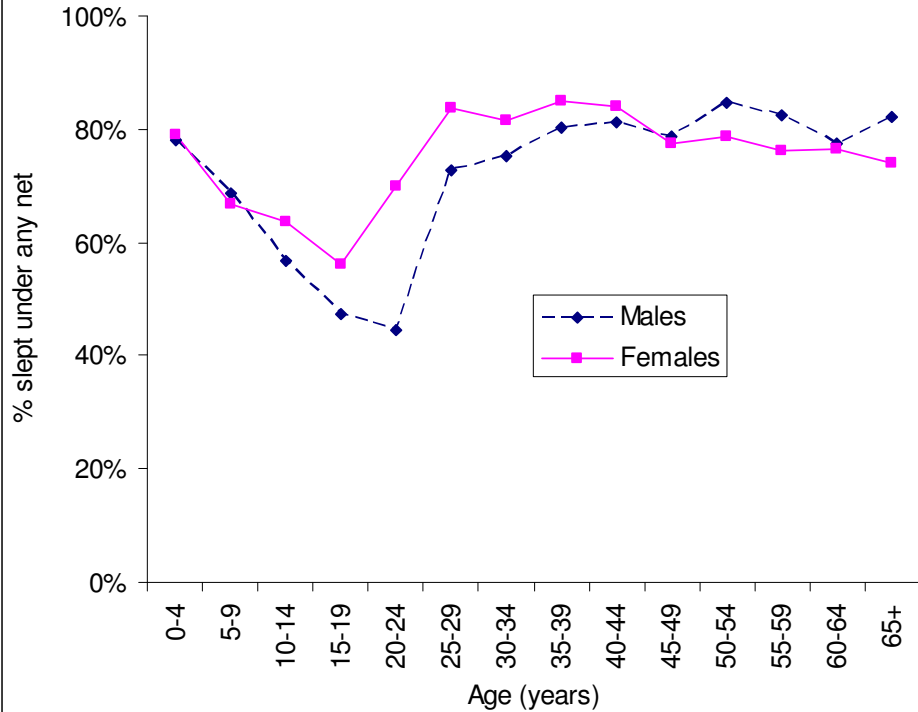

MIS 3R 2007

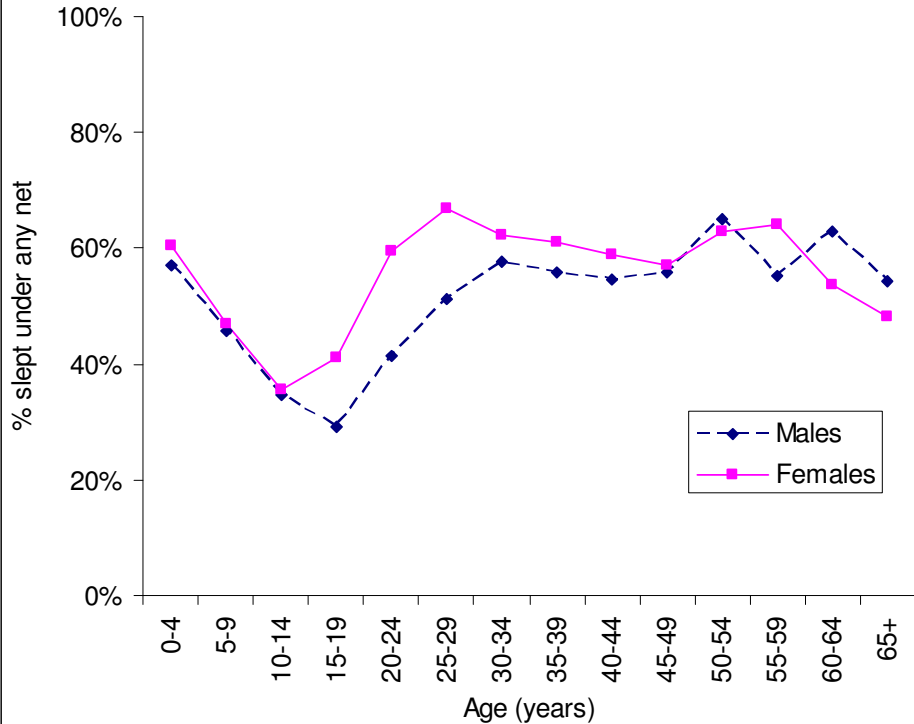

Supplement: MOESM2 [file 9542122]
